# Supplementary material for: Impact of Musashi-1 and Musashi-2 Double Knockdown on Notch Signaling and the Pathogenesis of Endometriosis
Source: MDPI journal article supplement (doi:10.3390/ijms23052851), 2022-03-05
Supplement: s1 [file s1]

# Impact of Musashi-1 and Musashi-2 double knockdown on Notch signaling and the pathogenesis of endometriosis

Theresa Strauß<sup>1</sup>, Burkhard Greve<sup>2</sup>, Michael Gabriel<sup>3</sup>, Nurjannah Achmad<sup>1§</sup>, Dhanusha Schwan<sup>1‡</sup>, Nancy Adriana Espinoza-Sanchez<sup>1,2</sup>, Antonio Simone Laganà<sup>4</sup>, Ludwig Kiesel<sup>1</sup>, Matti Poutanen<sup>5</sup>, Martin Götte<sup>1\*</sup> and Sebastian Daniel Schäfer<sup>1</sup>

<sup>1</sup> Department of Gynecology and Obstetrics, University Hospital Muenster, Albert-Schweitzer-Campus 1, Building A1, 48149 Münster, Germany; tete.strau@gmail.com; nurjannah.achmad@outlook.com; Dhanusha.Schwan@uk-essen.de; Ludwig.kiesel@ukmuenster.de; nancyadriana.espinozasanchez@ukmuenster.de; sd.schaefer@ukmuenster.de

<sup>2</sup> Department of Radiotherapy-Radiooncology, University Hospital Muenster, Albert-Schweitzer-Campus 1, Building A1, 48149 Muenster, Germany; greveb@uni-muenster.de; nancyadriana.espinozasanchez@ukmuenster.de

<sup>3</sup> Department of Obstetrics and Gynecology, Institute of Medicine and Research Centre for Integrative Physiology and Pharmacology, Institute of Biomedicine, University of Turku, Finland; micawo@utu.fi

<sup>4</sup> Department of Obstetrics and Gynecology, "Filippo Del Ponte" Hospital, University of Insubria, Varese, Italy; antoniosimone.lagana@uninsubria.it

<sup>5</sup> Research Centre for Integrative Physiology and Pharmacology, Institute of Biomedicine, University of Turku, Finland; matpou@utu.fi

§ present address: Jenderal Achmad Yani University, Cimahi, West Java, 40513 Indonesia

# present address: Klinische Forschergruppe 117, Universitätsklinikum Essen, Essen, Germany

\* Correspondence: mgotte@uni-muenster.de

## Supplementary Table S1. TaqMan assay IDs (Thermo Fisher)

| TaqMan-Sonden | Assay ID    |
|---------------|-------------|
| Aktin         | Hs999999903 |
| MSI-1         | Hs00159291  |
| MSI-2         | Hs00292670  |

## Supplementary Table S2. SYBR green PCR primer sequences

| SYBR green PCR primers   | Primer sequence             |
|--------------------------|-----------------------------|
| SOX-2 (forward primer)   | TGG CGA ACC ATC TCT GTG GT  |
| SOX-2 (reverse primer)   | CCA ACG GTG TCA ACC TGC AT  |
| AKTIN (forward primer)   | CAA AGA CCT GTA CGC CAA CAC |
| AKTIN (reverse primer)   | CAT ACT CCT GCT TGC TGA TCC |
| Notch-1 (forward primer) | GGT GAG ACC TGC CTGA ATG    |
| Notch-1 (reverse primer) | GTT GGG GTC CTG GCA TC      |
| Notch-2 (forward primer) | AAC TGT CAG ACC CTG GTG AAC |

|                          |                             |
|--------------------------|-----------------------------|
| Notch-2 (reverse primer) | CGA CAA GTG TAG CCT CCA ATC |
| Notch-3 (forward primer) | TGT GCA AAT GGA GGT CGT     |
| Notch-3 (reverse primer) | CCT GAG TGA CAG GGG TCC T   |
| Numb (forward primer)    | GGCACCACAATCTCCTACCTTC      |
| Numb (reverse primer)    | TGGTTTCACGCACAGGCATTGC      |
| HES-1 (forward primer)   | GTGAAGCACCTCCGGAAC          |
| HES-1 (reverse primer)   | CGTTCATGCACTCGCTGA          |
| HES 2 (forward primer)   | AACCAGAGCCTGAGCCAGCTTA      |
| HES 2 (reverse primer)   | TGCAGGAAGCGCACGGTCATTT      |
| HEY-1 (forward primer)   | GAGATCCTGCAGATGACCGT        |
| HEY-1 (reverse primer)   | AGATAACGCGCAACTTCTGC        |
| HEY-2 (forward primer)   | TTGCCCATGCCTAAACTAGTGC      |
| HEY-2 (reverse primer)   | TCTCACGTGCTTGATTTACGCATA    |
| KLF-4 (forward primer)   | GCCTAAATGATGGTGCTTGGTG      |
| KLF-4 (reverse primer)   | GCAGTTTGAAAACCTTTGGCTTCC    |
| OCT-4 (forward primer)   | CTGGAGTTTGTGCCAGGGTTT       |
| OCT-4 (reverse primer)   | CTTCACCTTCCCTCCAACCAG       |
| LIF-R (forward primer)   | TCTTGCGAGCCTATACAGAT        |
| LIF-R (reverse primer)   | TCTGGATTTGGAATATCAGG        |
| Tert (forward primer)    | GGAGCAAGTTGCAAAGCATTG       |
| Tert (reverse primer)    | TCCCACGACGTAGTCCATGTT       |

**Supplementary Table S3** Antibodies used for western blotting

| Primary antibody (manufacturer) | Secondary antibody | Dilution (1.Ab/2.Ab) |
|---------------------------------|--------------------|----------------------|
| Musashi-1 (Santa Cruz)          | Anti-Mouse IgG     | 1:200                |
| Musashi-2 (Abnova)              | Anti-Mouse IgG     | 1:2000               |
| p21 (Cell Signaling)            | Anti-Rabbit IgG    | 1:1.000              |
| FOXA2 (Cell Signaling)          | Anti-Rabbit IgG    | 1:1000               |
| Notch 3 (Cell Signaling)        | Anti-Rabbit IgG    | 1:1000               |
| Alpha-Tubulin (Santa Cruz)      | Anti-Mouse IgG     | 1:4.000              |

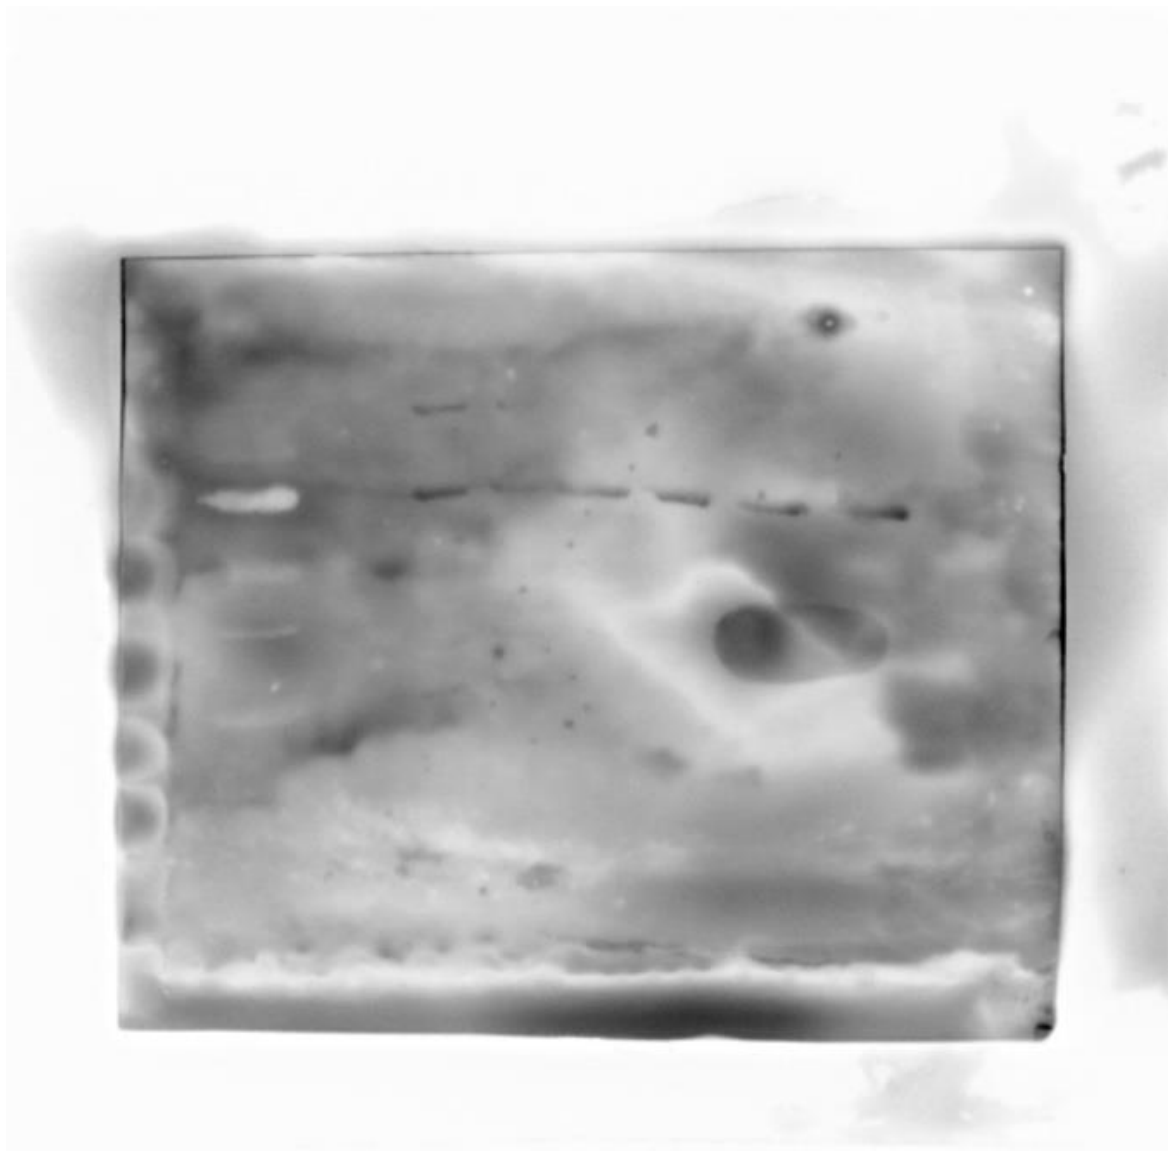

**Supplementary Figure S1-** Western Blot for Notch 3 - Lane 1: control 12-Z, lane 2: MSI-1- and MSI-2-double-knockdown, lane 3 and 4: patient 2 control, lane 5 and 6: patient 2 MSI-1- and MSI-2-double-knockdown, Left lane = Molecular weight markers

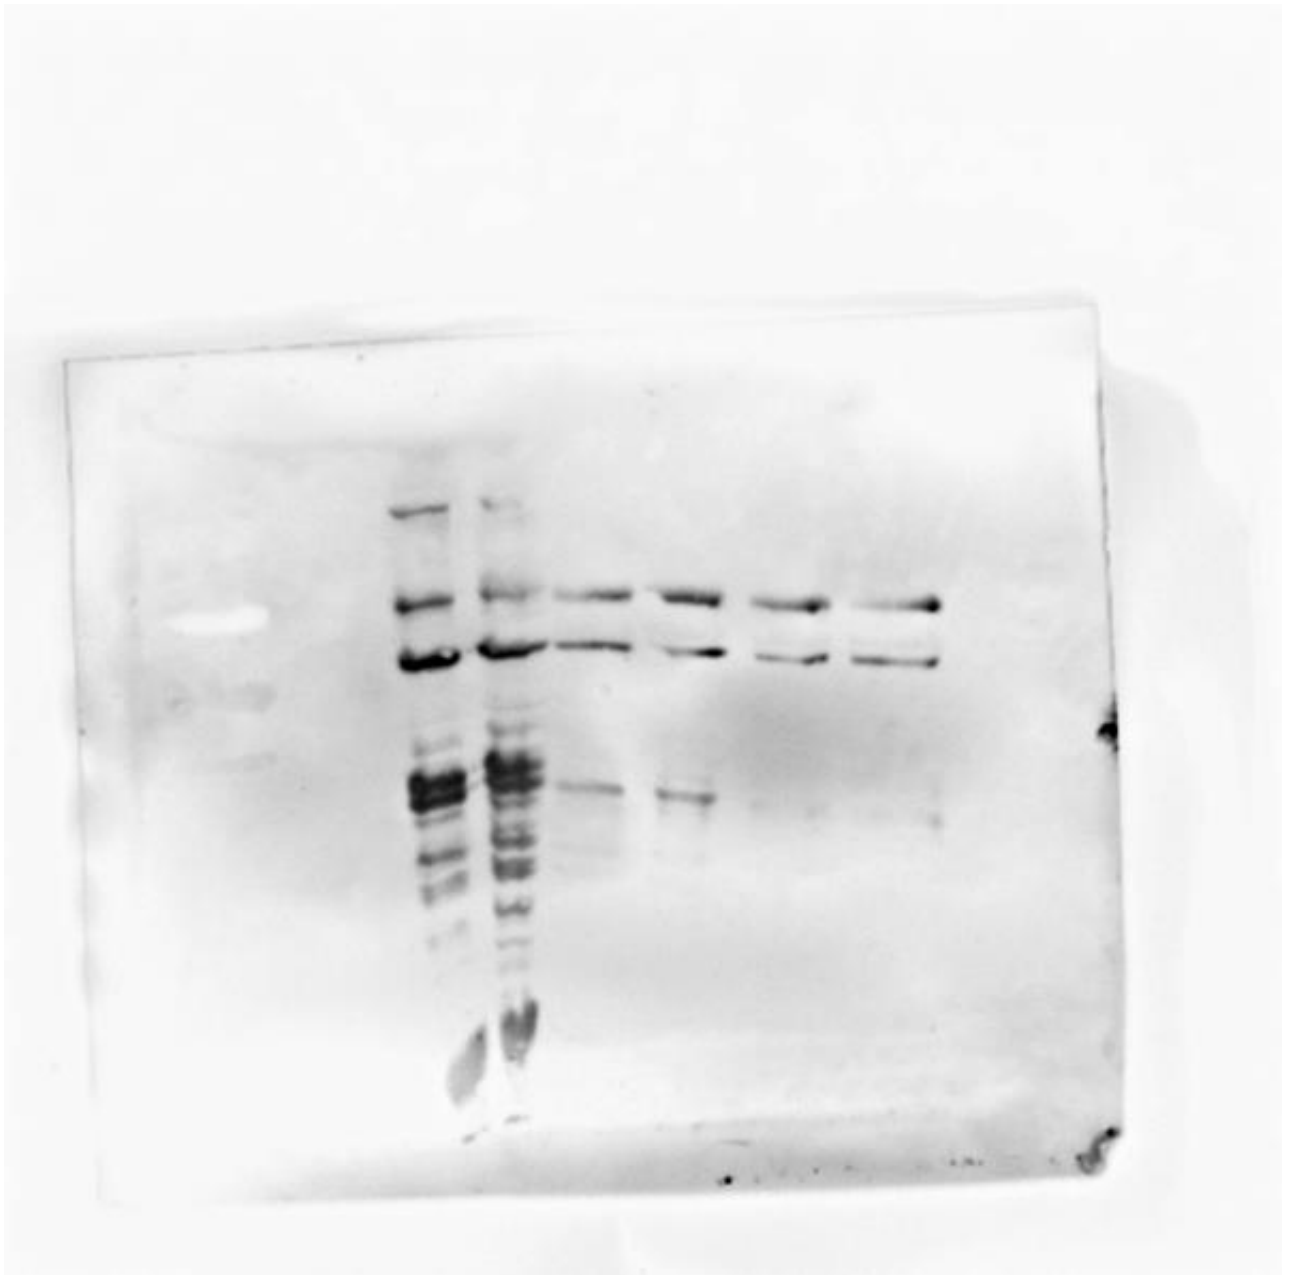

**Supplementary Figure S2-** Western Blot for Tubulin corresponding to samples shown in Fig. S1 - Lane 1: control 12-Z, lane 2: MSI-1- and MSI-2-double-knockdown, lane 3 and 4: patient 2 control, lane 5 and 6: patient 2 MSI-1- and MSI-2-double-knockdown Left lane = Molecular weight markers

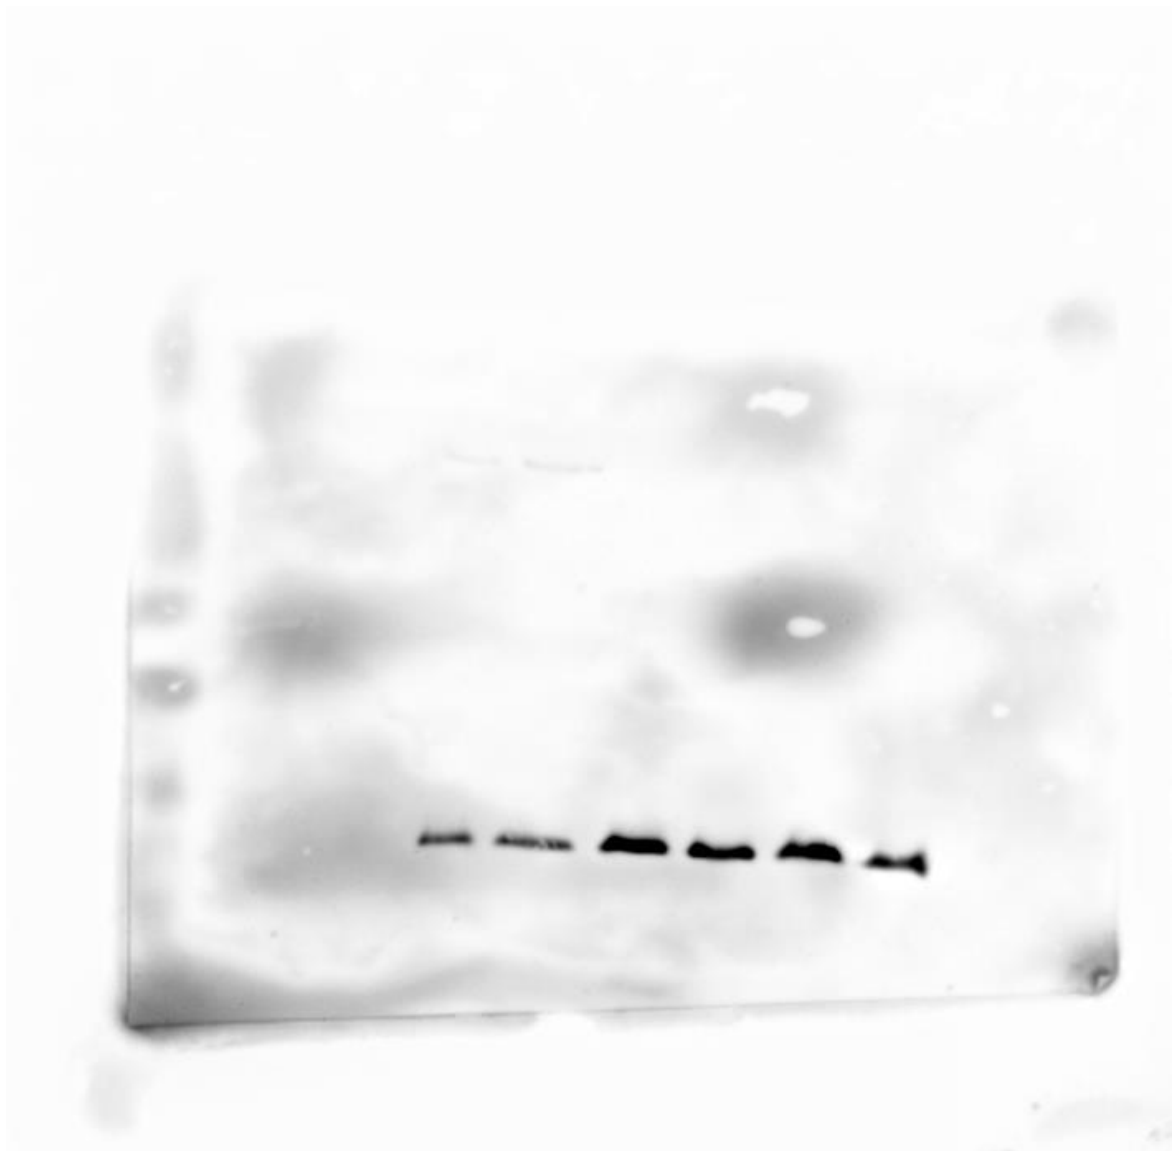

**Supplementary Figure S3-** Western Blot for Foxa2 - Lane 1: control 12-Z, lane 2: MSI-1- and MSI-2-double-knockdown, lane 3 and 4: patient 2 control, lane 5 and 6: patient 2 MSI-1- and MSI-2-double-knockdown

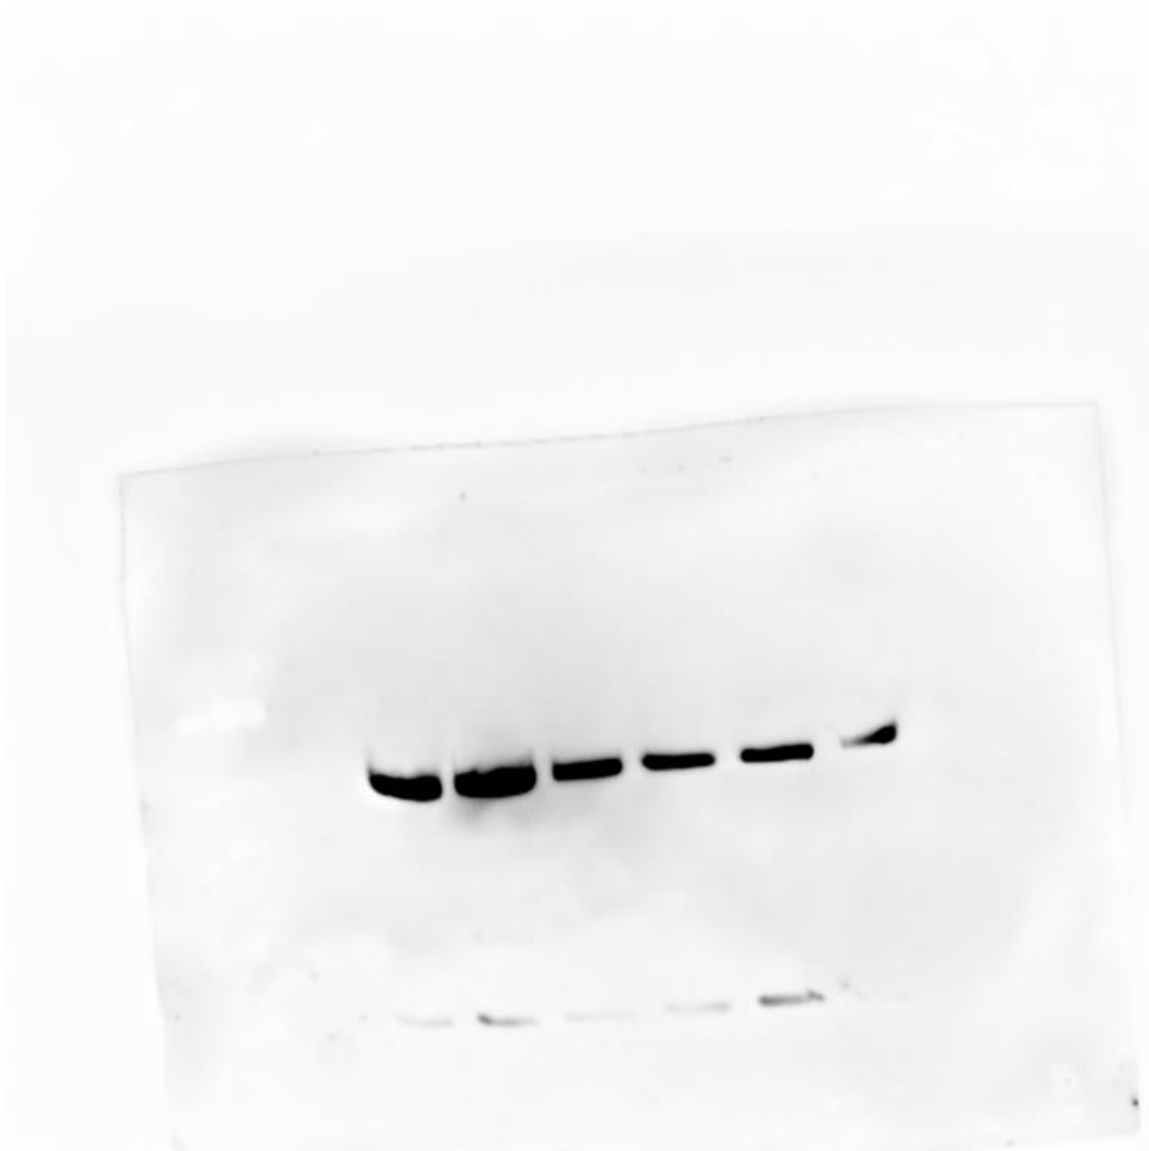

**Supplementary Figure S4-** Western Blot for Tubulin corresponding to samples of Figure S3.  
- Lane 1: control 12-Z, lane 2: MSI-1- and MSI-2-double-knockdown, lane 3 and 4: patient 2 control, lane 5 and 6: patient 2 MSI-1- and MSI-2-double-knockdown

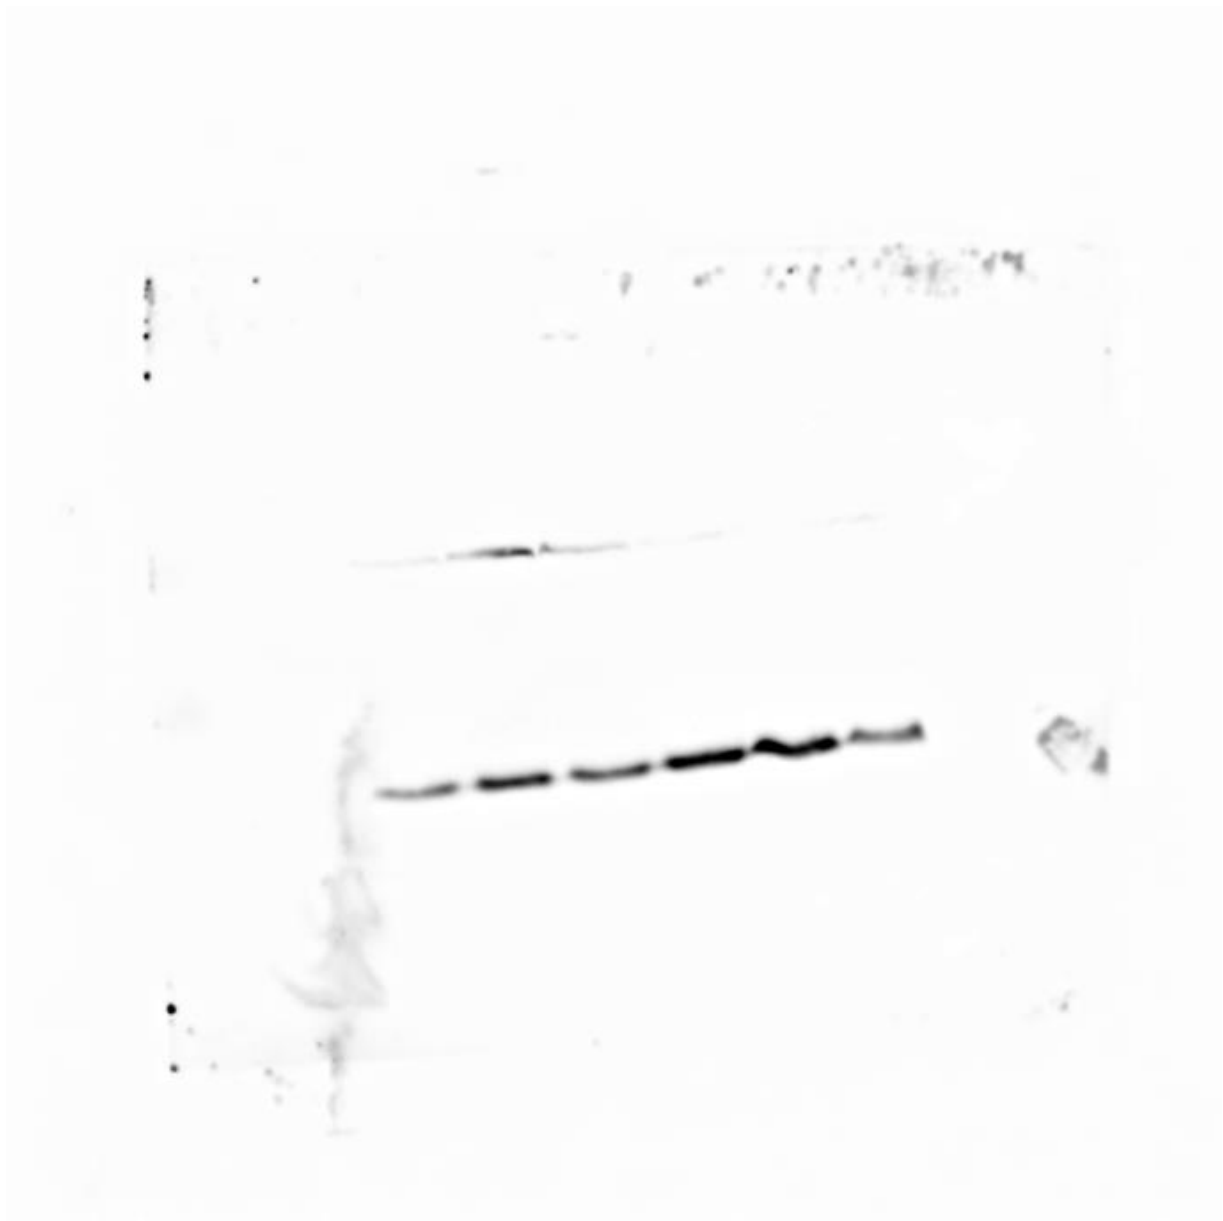

**Supplementary Figure S5-** Western Blot for p21 in 12-Z cells - Lane 1-3: control, lane 4-6: MSI-1- and MSI-2-double-knockdown

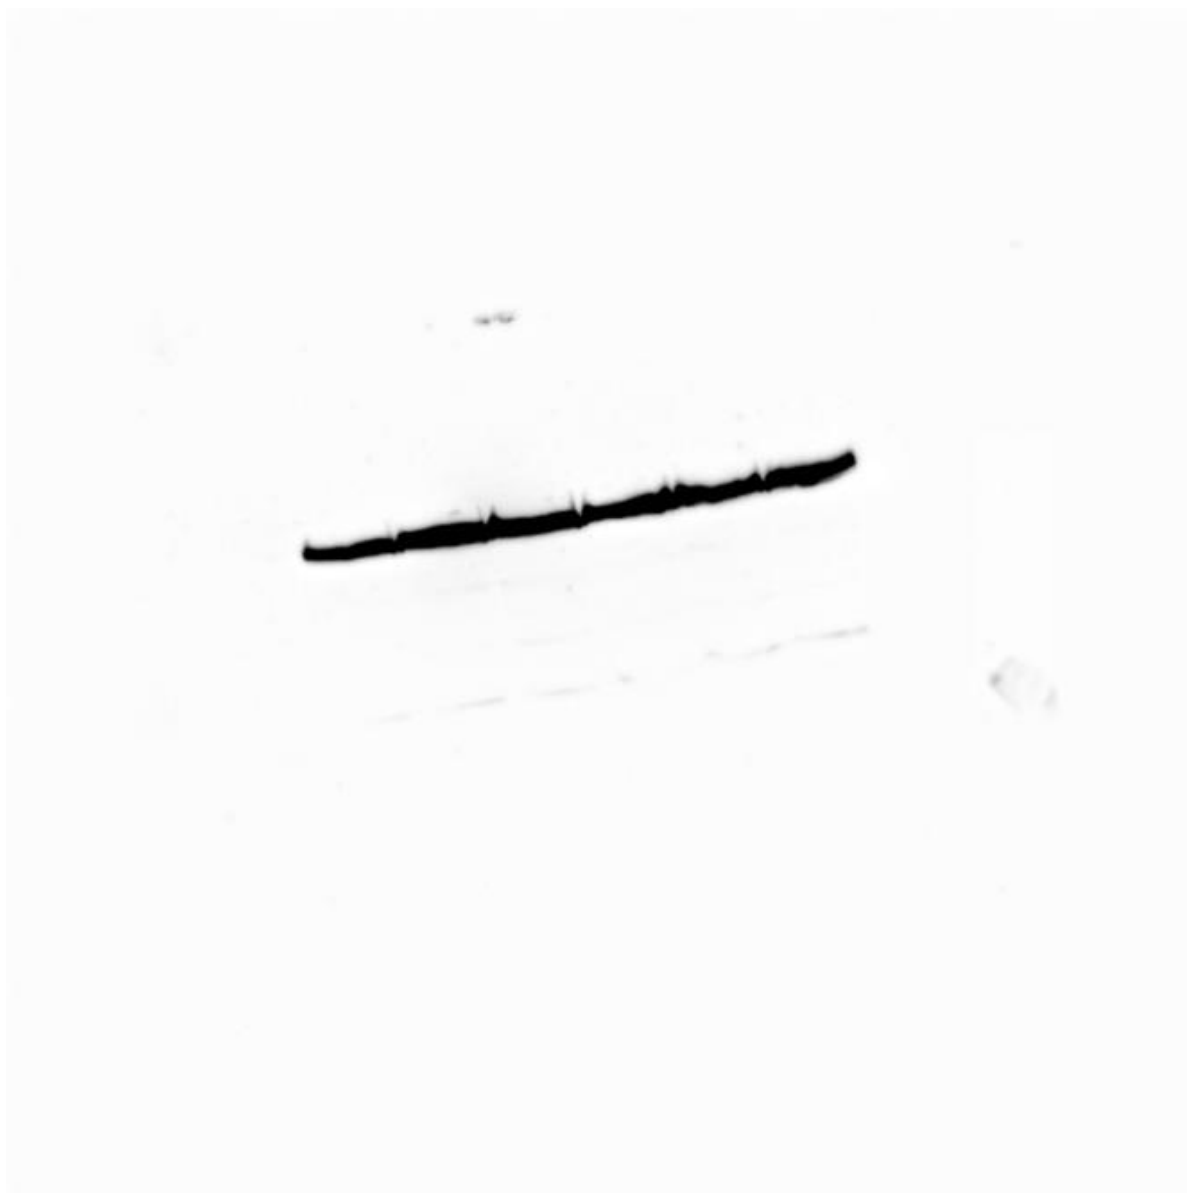

**Supplementary Figure S6-** Western Blot for Tubulin in 12-Z cells, samples correspond to figure S5 - Lane 1-3: control, lane 4-6: MSI-1- and MSI-2-double-knockdown
